# Supplementary material for: An oocyte meiotic midbody cap is required for developmental competence in mice
Source: Research Square preprint supplement (doi:10.21203/rs.3.rs-3399188/v1), 2023-10-05

**Supplementary Figures for “An oocyte meiotic midbody cap is required for developmental competence in mice”**

Figure S1

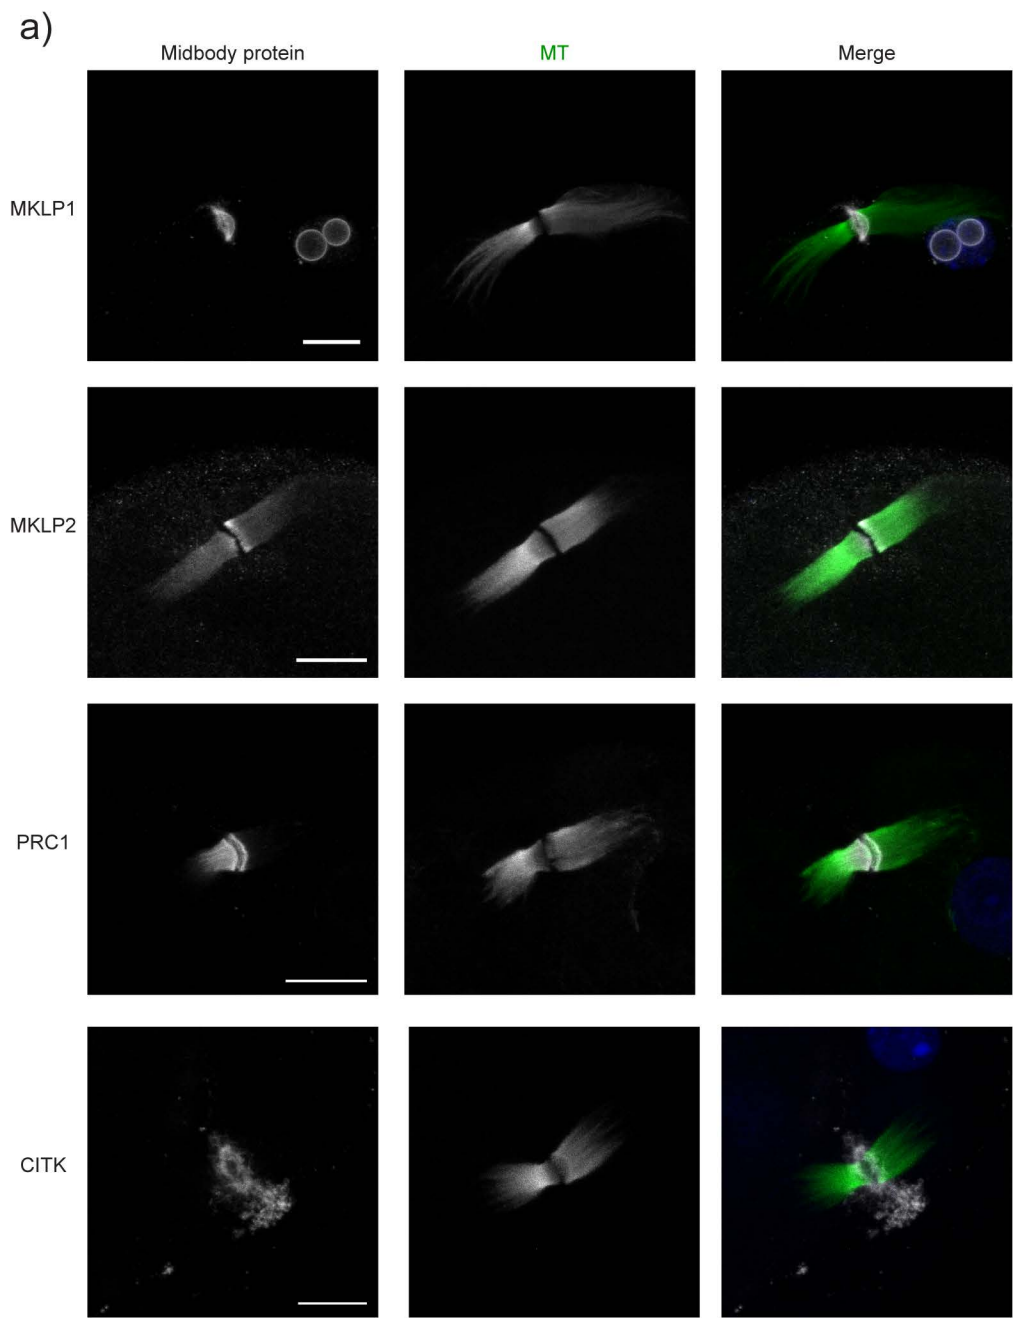

Figure S2

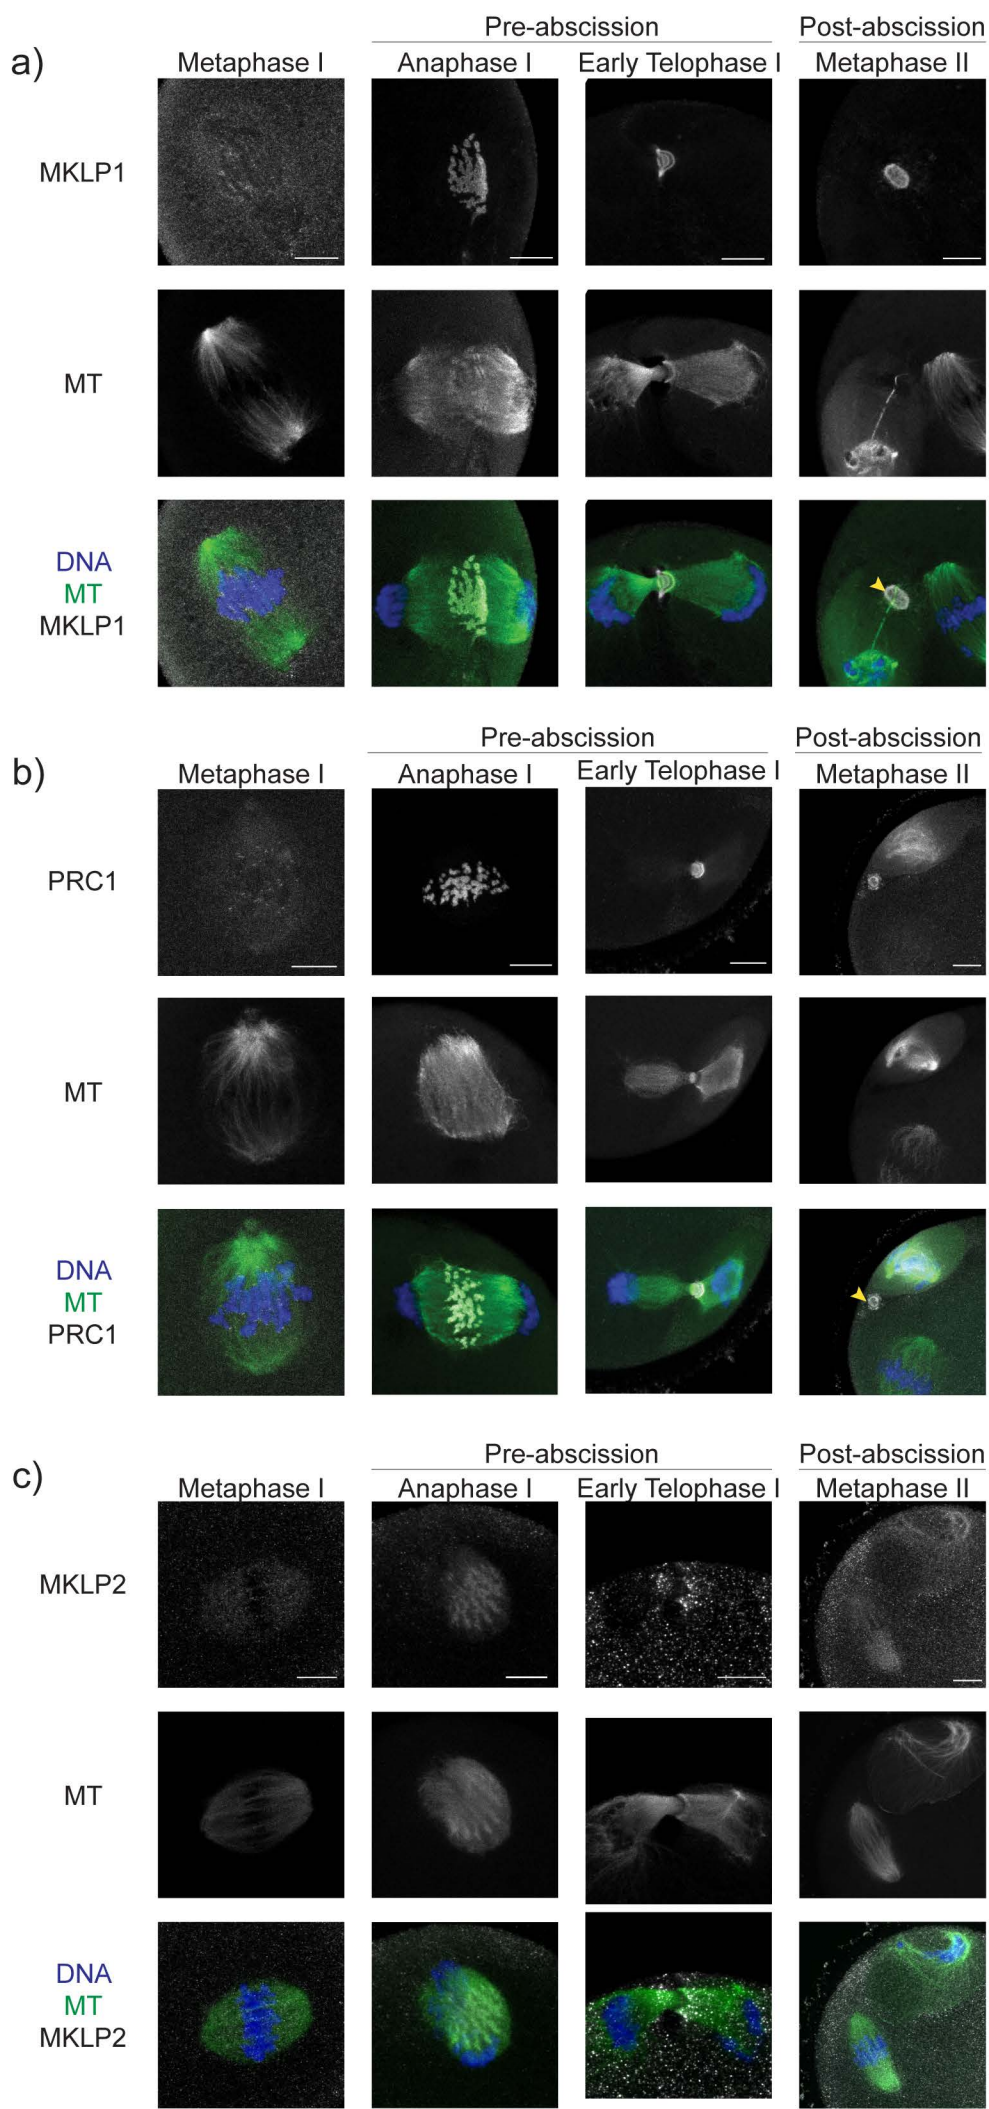

Figure S3

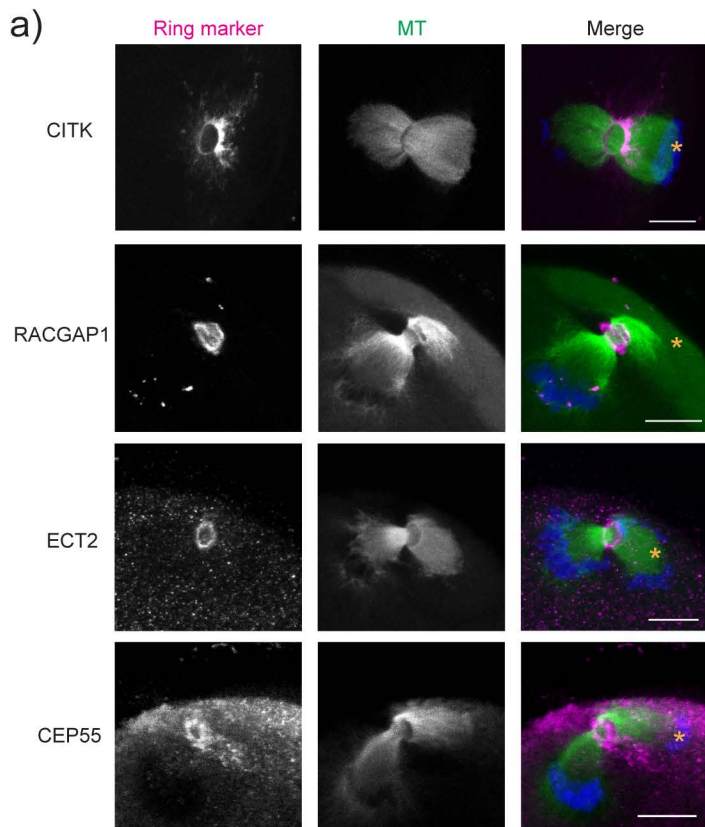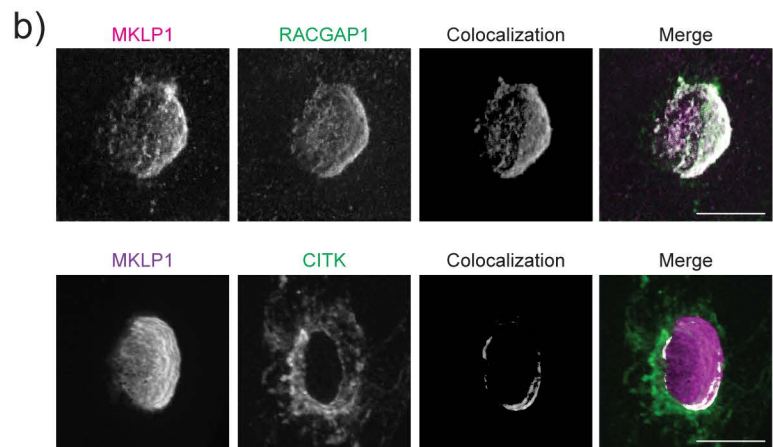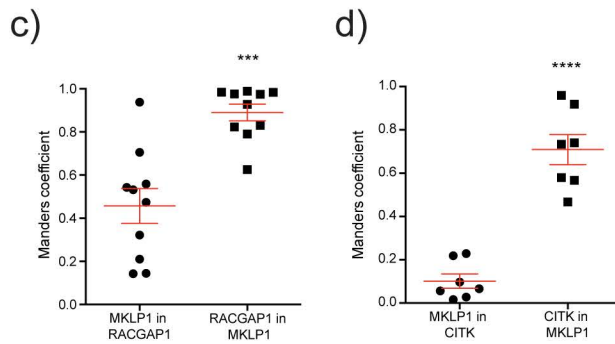

Figure S4

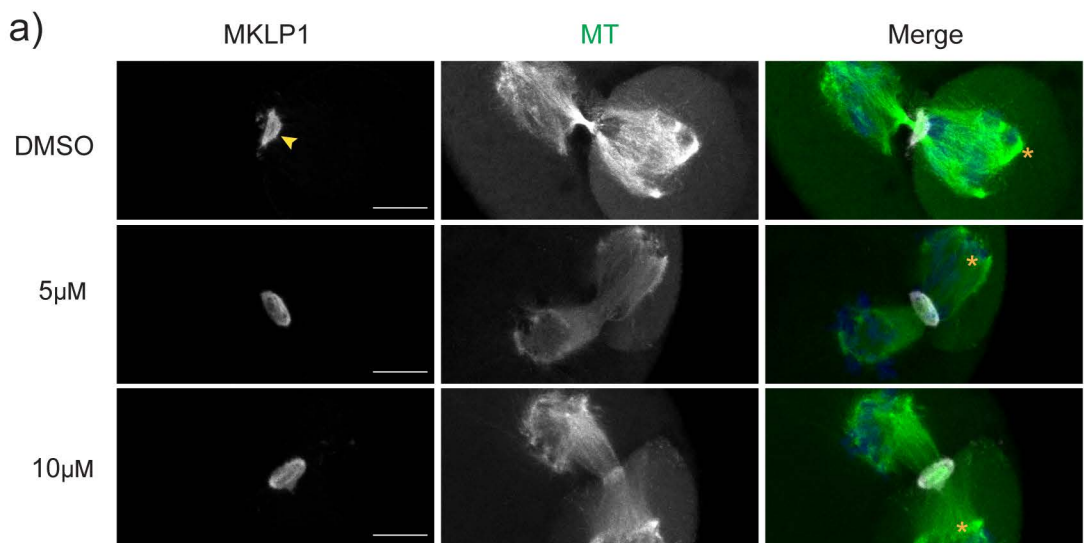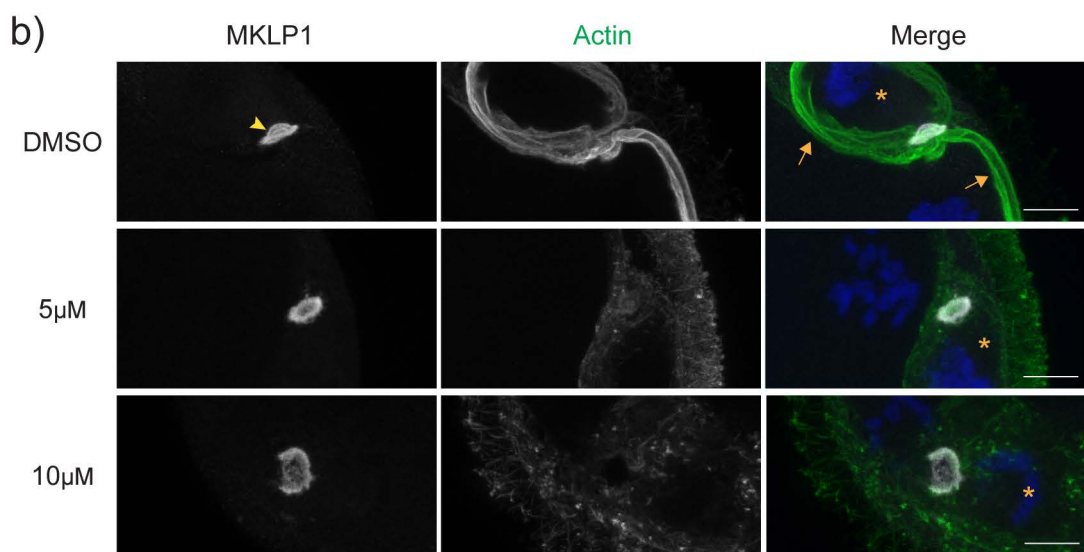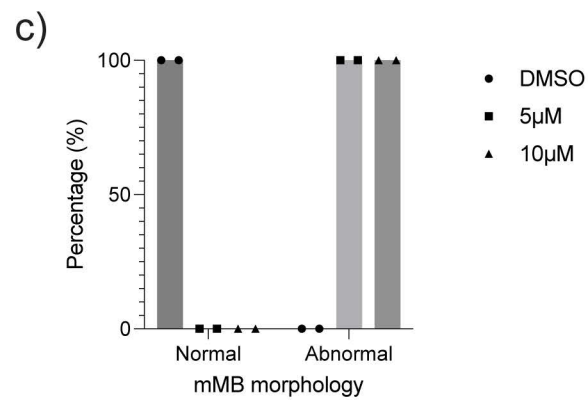

Figure S5

a)

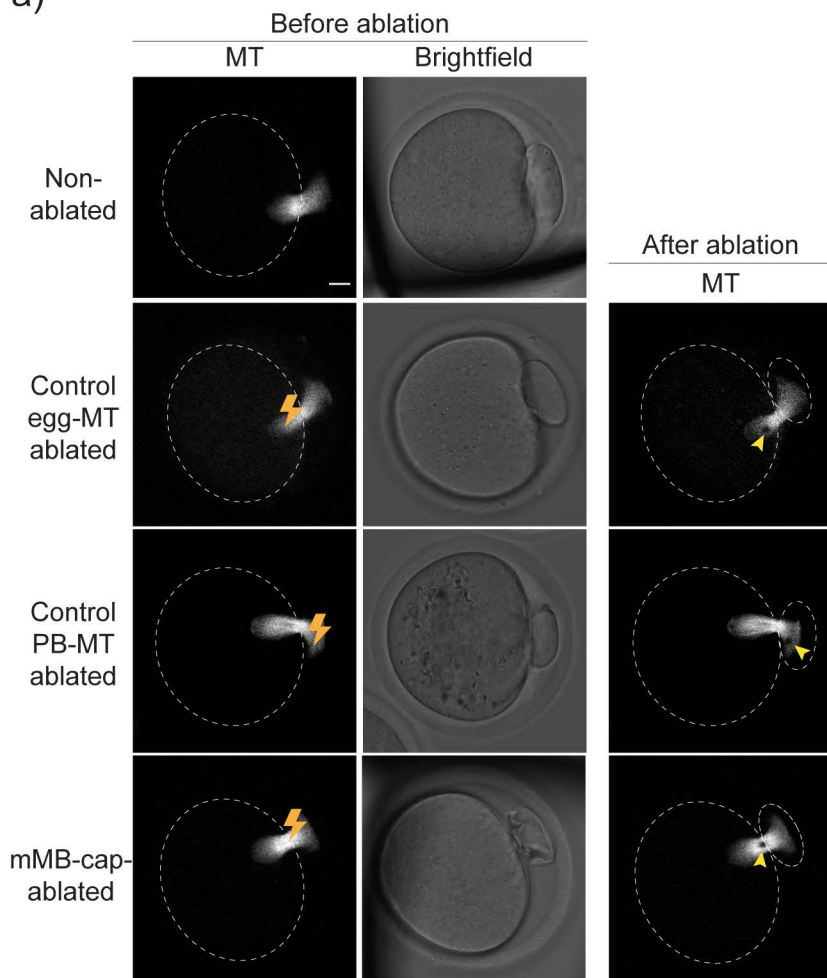

c)

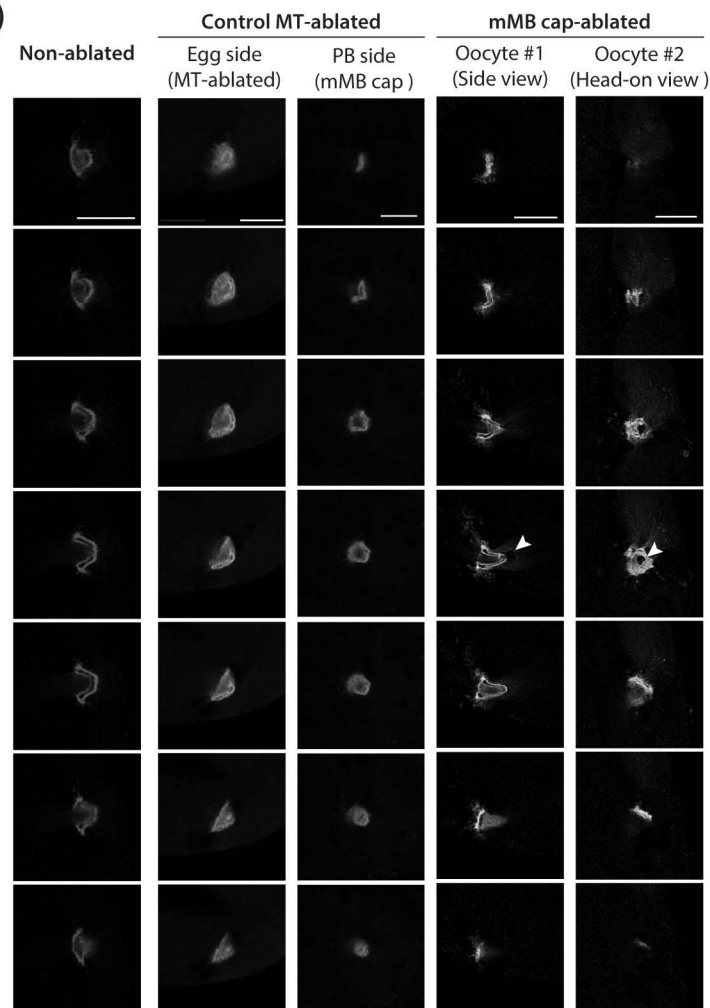

b)

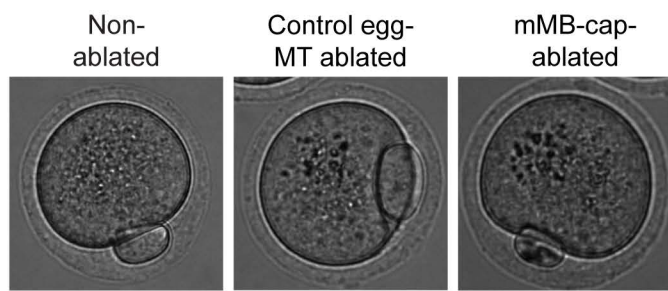

Figure S6

a)

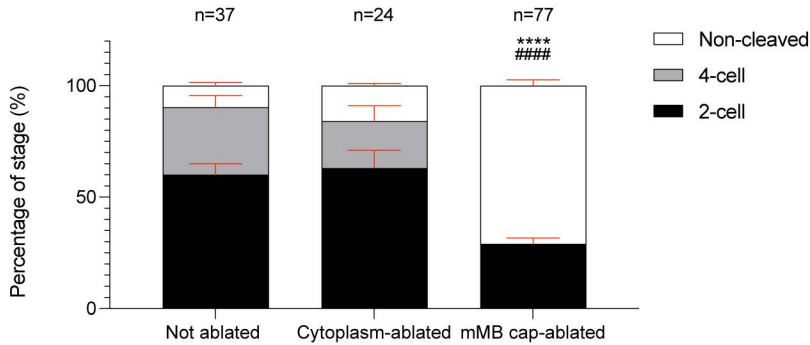

Supplement: Supplementary file 1 [file 872c44d0f1c88cbe69bce7e1.pdf]
